# Supplementary material for: Pulmonary and Extrapulmonary Manifestations in Hospitalized Children with Mycoplasma Pneumoniae Infection
Source: MDPI journal article supplement (doi:10.3390/microorganisms9122553), 2021-12-10
Supplement: s1 [file s1]

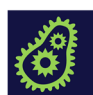

**Table S1.** Demographic, laboratory and clinical data of MP patients admitted in 2014 and those admitted outside this period.

|                                                                     | Total<br><i>n</i> = 145 (100%) | 2014 patients<br><i>n</i> = 48 (33.1%) | Other years<br>patients<br><i>n</i> = 97 (66.9%) | <i>p</i> -value |
|---------------------------------------------------------------------|--------------------------------|----------------------------------------|--------------------------------------------------|-----------------|
| <b>Demographic and Anamnestic Data:</b>                             |                                |                                        |                                                  |                 |
| Sex, <i>n</i> (%), male                                             | 82 (56.6)                      | 24 (50)                                | 58 (59.8)                                        | 0.263           |
| Background disease*, <i>n</i> (%)                                   | 34 (23.4)                      | 6 (12.5)                               | 28 (28.9)                                        | <b>0.029</b>    |
| Season, <i>n</i> (%)                                                |                                |                                        |                                                  | <b>0.038</b>    |
| Spring                                                              | 33 (22.8)                      | 14 (29.2)                              | 19 (19.6)                                        |                 |
| Summer                                                              | 40 (27.6)                      | 18 (37.5)                              | 22 (22.7)                                        |                 |
| Autumn                                                              | 33 (22.8)                      | 9 (18.8)                               | 24 (24.7)                                        |                 |
| Winter                                                              | 39 (26.9)                      | 7 (14.6)                               | 32 (33.0)                                        |                 |
| Time between symptoms onset and hospitalization, days (median, IQR) | 7.0 (4.0-10.0)                 | 7.0 (5.0-9.8)                          | 6.0 (3.0-10.0)                                   | 0.348           |
| Treatment prior to hospitalization, <i>n</i> (%)                    |                                |                                        |                                                  | 0.085           |
| No antibiotic                                                       | 63 (43.4)                      | 16 (33.3)                              | 47 (48.5)                                        |                 |
| Empiric b-lactam                                                    | 64 (44.1)                      | 25 (52.1)                              | 39 (40.2)                                        |                 |
| Empiric macrolide                                                   | 10 (6.9)                       | 2 (4.2)                                | 8 (8.2)                                          |                 |
| Empiric b-lactam + macrolide                                        | 8 (5.5)                        | 5 (10.4)                               | 3 (3.1)                                          |                 |
| Fever ( $\geq 38^{\circ}\text{C}$ ), <i>n</i> (%)                   | 121 (83.4)                     | 40 (83.3)                              | 81 (83.5)                                        | 0.979           |
| Any respiratory manifestations, <i>n</i> (%)                        | 130 (89.7)                     | 46 (95.8)                              | 84 (86.6)                                        | 0.086           |
| Rhinitis, <i>n</i> (%)                                              | 24 (16.6)                      | 4 (8.3)                                | 20 (20.6)                                        | 0.061           |
| Pharyngitis, <i>n</i> (%)                                           | 86 (59.3)                      | 28 (58.3)                              | 58 (59.7)                                        | 0.434           |
| Middle Ear involvement, <i>n</i> (%)                                | 22 (15.2)                      | 3 (6.3)                                | 19 (19.6)                                        | 0.059           |
| Neck lymphadenopathy, <i>n</i> (%)                                  | 15 (10.3)                      | 4 (8.3)                                | 11 (11.3)                                        | 0.659           |
| Cough, <i>n</i> (%)                                                 | 113 (77.9)                     | 39 (81.3)                              | 74 (76.3)                                        | 0.498           |
| Chest pain, <i>n</i> (%)                                            | 3 (2.1)                        | 1 (2.1)                                | 2 (2.1)                                          | 0.993           |
| Tachypnea, <i>n</i> (%)                                             | 49 (33.8)                      | 13 (27.1)                              | 36 (37.1)                                        | 0.230           |
| Any findings on lung auscultation, <i>n</i> (%)                     | 108 (74.5)                     | 44 (91.7)                              | 64 (66.0)                                        | <b>0.001</b>    |
| <b>Extrapulmonary Manifestations:</b>                               |                                |                                        |                                                  |                 |
| Any, <i>n</i> (%)                                                   | 74 (51.0)                      | 28 (58.3)                              | 46 (47.4)                                        | 0.633           |
| Involvement of 1 site, <i>n</i> (%)                                 | 56 (38.6)                      | 22 (45.8)                              | 34 (35.1)                                        |                 |
| Involvement of 2 sites, <i>n</i> (%)                                | 16 (11)                        | 6 (12.5)                               | 10 (10.3)                                        |                 |
| Involvement of 3 sites, <i>n</i> (%)                                | 3 (2.1)                        | 1 (2.1)                                | 2 (2.1)                                          |                 |
| Involvement of 4 sites, <i>n</i> (%)                                | 1 (0.7)                        | 0                                      | 1 (1.0)                                          |                 |
| Cutaneous involvement:                                              |                                |                                        |                                                  | 0.861           |
| Any, <i>n</i> (%)                                                   | 21 (14.5)                      | 2 (5.1)                                | 5 (14.7)                                         |                 |
| Skin, <i>n</i> (%)                                                  | 16 (11.0)                      | 6 (12.5)                               | 10 (10.3)                                        |                 |
| Skin + mucous membranes, <i>n</i> (%)                               | 4 (2.8)                        | 1 (2.1)                                | 3 (3.1)                                          |                 |
| Retropharyngeal abscess, <i>n</i> (%)                               | 1 (0.7)                        | 0                                      | 1 (1.0)                                          |                 |

|                                                                   |                           |                           |                           |              |
|-------------------------------------------------------------------|---------------------------|---------------------------|---------------------------|--------------|
| Gastrointestinal involvement:                                     |                           |                           |                           | 0.376        |
| Any, n (%)                                                        | 43 (29.6)                 | 13 (33.3)                 | 10 (29.4)                 |              |
| Nausea or vomit, n (%)                                            | 22 (15.2)                 | 11 (22.9)                 | 11 (11.3)                 |              |
| Diarrhea, n (%)                                                   | 6 (4.1)                   | 3 (6.3)                   | 3 (3.1)                   |              |
| Abdominal pain, n (%)                                             | 4 (2.7)                   | 1 (2.1)                   | 3 (3.1)                   |              |
| More than 1 symptom, n (%)                                        | 10 (6.9)                  | 2 (4.2)                   | 8 (8.2)                   |              |
| Serum transaminases elevation, n (%)                              | 1 (0.7)                   | 0                         | 1 (1.0)                   |              |
| Neurological involvement:                                         |                           |                           |                           | 0.063        |
| Any, n (%)                                                        | 16 (11.0)                 | 7 (14.6)                  | 9 (9.3)                   |              |
| Headache, n (%)                                                   | 12 (8.3)                  | 7 (14.6)                  | 5 (5.2)                   |              |
| Other symptoms (weakness, dysesthesia, dystonic movements), n (%) | 4 (2.7)                   | 0                         | 4 (4.1)                   |              |
| Cardiovascular involvement:                                       |                           |                           |                           | 0.565        |
| Any, n (%)                                                        | 4 (2.7)                   | 0                         | 4 (4.1)                   |              |
| Hypertension, n (%)                                               | 1 (0.7)                   | 0                         | 1 (1.0)                   |              |
| Pericardial effusion, n (%)                                       | 2 (1.4)                   | 0                         | 2 (2.1)                   |              |
| Myopericarditis, n (%)                                            | 1 (0.7)                   | 0                         | 1 (1.0)                   |              |
| Musculoskeletal involvement:                                      |                           |                           |                           | 0.933        |
| Any, n (%)                                                        | 14 (9.6)                  | 4 (10.2)                  | 3 (8.8)                   |              |
| Arthralgia, n (%)                                                 | 5 (3.4)                   | 2 (4.2)                   | 3 (3.1)                   |              |
| Joint swelling, n (%)                                             | 2 (1.4)                   | 1 (2.1)                   | 1 (1.0)                   |              |
| Myalgia + serum CK elevation, n (%)                               | 7 (4.8)                   | 2 (4.2)                   | 5 (5.2)                   |              |
| Genitourinary involvement:                                        |                           |                           |                           |              |
| Macrohematuria, n (%)                                             | 4 (2.8)                   | 1 (2.1)                   | 3 (3.1)                   | 0.727        |
| <b>Laboratory Tests:</b>                                          |                           |                           |                           |              |
| WBC at admission (median, IQR)                                    | 10,100 (7,312-14,832)     | 10,195 (6,635-13,503)     | 9,885 (7,625-15,335)      | 0.543        |
| Neutrophil Count at admission (median, IQR)                       | 5,795 (4,250-9,565)       | 6,095 (4,105-9,920)       | 5,735 (4,400-9,370)       | 0.811        |
| Lymphocytes count at admission (median, IQR)                      | 2,226 (1,492-3,707)       | 1,850 (1,215-3,068)       | 2,720 (1,580-4,540)       | <b>0.007</b> |
| Platelet count at admission (median, IQR)                         | 325,000 (247,250-420,500) | 300,500 (225,000-401,000) | 332,500 (258,750-430,250) | 0.171        |
| Hb at admission (median, IQR)                                     | 12.4 (11.4-13.2)          | 12.6 (11.7-13.8)          | 12.3 (11.2-12.9)          | <b>0.014</b> |
| CRP at admission (median, IQR)                                    | 1.76 (0.76-5.15)          | 2.08 (0.90-4.49)          | 1.63 (0.71-6.21)          | 0.891        |
| Anti-MP IgM:                                                      |                           |                           |                           | 0.072        |
| Not performed, n (%)                                              | 74 (51.0)                 | 18 (37.5)                 | 56 (57.7)                 |              |
| Negative, n (%)                                                   | 36 (24.8)                 | 15 (31.3)                 | 21 (21.6)                 |              |

|                                                    |               |               |               |              |
|----------------------------------------------------|---------------|---------------|---------------|--------------|
| Positive, n (%)                                    | 35 (24.1)     | 15 (31.3)     | 20 (20.6)     |              |
| <b>CXR Findings:</b>                               |               |               |               |              |
| Not performed, n (%)                               | 24 (16.6)     | 2 (4.2)       | 22 (22.7)     | <b>0.007</b> |
| Negative for lung consolidation, n (%)             | 13 (9.0)      | 2 (4.2)       | 11 (11.3)     |              |
| Lung consolidation without pleural effusion, n (%) | 76 (52.4)     | 29 (60.4)     | 47 (48.5)     |              |
| Lung consolidation with pleural effusion, n (%)    | 32 (22.1)     | 15 (31.3)     | 17 (17.5)     |              |
| <b>Hospital Course:</b>                            |               |               |               |              |
| Coinfection, n (%)                                 |               |               |               | 0.180        |
| Any                                                | 19 (13.1)     | 3 (6.3)       | 16 (16.5)     |              |
| Viral etiology                                     | 16 (11.0)     | 3 (6.3)       | 13 (13.5)     |              |
| Bacterial etiology                                 | 3 (2.1)       | 0             | 3 (3.1)       |              |
| Treatment with macrolide in hospital, n (%)        | 92 (63.4)     | 32 (66.7)     | 60 (61.9)     | 0.571        |
| Oxygen therapy, n (%)                              | 18 (12.4)     | 2 (4.2)       | 16 (16.5)     | <b>0.034</b> |
| Intravenous fluid therapy, n (%)                   | 125 (86.2)    | 45 (93.8)     | 80 (82.5)     | 0.064        |
| Length of hospital stay, days (median, IQR)        | 5.0 (3.0-6.0) | 4.0 (3.0-5.0) | 5.0 (4.0-7.5) | <b>0.001</b> |

Significant differences for p-values are indicated in bold. \*Background disease includes: chronic pulmonary disease, congenital heart disease, immunodeficiency or severe neurological or muscular disease. CRP: c-reactive protein; CXR: chest x-ray; Hb: Hemoglobin; IgM: Immunoglobulin M; IQR: interquartile range; MP: Mycoplasma pneumoniae; WBC: White Blood Cells.
